# Supplementary material
Source: Springer Nature journal article supplement (https://www.springermedizin.de/resource/supplementary/12968_2012_3275_MOESM1_ESM.pdf/9583502)
Supplement: MOESM1 [file 9583502]

# SIEMENS MAGNETOM Avanto syngo MR B17

\\USER\People\StefanP\ShMolliTemplates1.5T\ShortMolli\_Oxford

TA: 6.3 s    PAT: 2    Voxel size: 1.8x1.8x8.0 mm    Rel. SNR: 1.00    USER: CV\_molli\_561

## Properties

|                                               |        |
|-----------------------------------------------|--------|
| Prio Recon                                    | Off    |
| Before measurement                            |        |
| After measurement                             |        |
| Load to viewer                                | On     |
| Inline movie                                  | Off    |
| Auto store images                             | On     |
| Load to stamp segments                        | Off    |
| Load images to graphic segments               | Off    |
| Auto open inline display                      | Off    |
| Start measurement without further preparation | On     |
| Wait for user to start                        | On     |
| Start measurements                            | single |

## Routine

|                    |                        |
|--------------------|------------------------|
| Slice group 1      |                        |
| Slices             | 1                      |
| Dist. factor       | 25 %                   |
| Position           | L90.7 A37.3 H25.7      |
| Orientation        | S > C43.0 > T25.7      |
| Phase enc. dir.    | A >> P                 |
| Rotation           | 0.00 deg               |
| Auto               | Off                    |
| Phase oversampling | 0 %                    |
| FoV read           | 340 mm                 |
| FoV phase          | 68.8 %                 |
| Slice thickness    | 8.0 mm                 |
| TR                 | 198.77 ms              |
| TE                 | 1.07 ms                |
| Averages           | 1                      |
| Concatenations     | 1                      |
| Filter             | Raw filter, Distortion |
|                    | Corr.(2D)              |
| Coil elements      | BA1-4;BP1-4            |

## Contrast

|                   |             |
|-------------------|-------------|
| Magn. preparation | Non-sel. IR |
| TI                | 100 ms      |
| Flip angle        | 35 deg      |
| Fat suppr.        | None        |
| Restore magn.     | On          |
| -----             |             |
| Averaging mode    | Short term  |
| Reconstruction    | Magn./Phase |
| Measurements      | 1           |
| Multiple series   | Off         |

## Resolution

|                       |               |
|-----------------------|---------------|
| Base resolution       | 192           |
| Phase resolution      | 100 %         |
| Phase partial Fourier | 6/8           |
| Trajectory            | Cartesian     |
| Interpolation         | On            |
| -----                 |               |
| PAT mode              | GRAPPA        |
| Accel. factor PE      | 2             |
| Ref. lines PE         | 24            |
| Matrix Coil Mode      | Auto (Triple) |
| Reference scan mode   | Integrated    |
| -----                 |               |
| Image Filter          | Off           |
| Distortion Corr.      | On            |
| Mode                  | 2D            |
| Unfiltered images     | Off           |

|                   |      |
|-------------------|------|
| Prescan Normalize | Off  |
| Normalize         | Off  |
| B1 filter         | Off  |
| Raw filter        | On   |
| Intensity         | Weak |
| Slope             | 25   |
| Elliptical filter | Off  |
| POCS              | Off  |

## Geometry

|                  |             |
|------------------|-------------|
| Multi-slice mode | Sequential  |
| Series           | Interleaved |
| -----            |             |
| Special sat.     | None        |

## System

|                          |                  |
|--------------------------|------------------|
| Body                     | Off              |
| BA1                      | On               |
| BA2                      | On               |
| BA3                      | On               |
| BA4                      | On               |
| BP1                      | On               |
| BP2                      | On               |
| BP3                      | On               |
| BP4                      | On               |
| -----                    |                  |
| Positioning mode         | REF              |
| Table position           | F                |
| Table position           | 26 mm            |
| MSMA                     | S - C - T        |
| Sagittal                 | R >> L           |
| Coronal                  | A >> P           |
| Transversal              | F >> H           |
| Save uncombined          | Off              |
| Coil Combine Mode        | Adaptive Combine |
| AutoAlign                | ---              |
| Auto Coil Select         | Default          |
| -----                    |                  |
| Shim mode                | Tune up          |
| Adjust with body coil    | Off              |
| Confirm freq. adjustment | Off              |
| Assume Silicone          | Off              |
| ? Ref. amplitude 1H      | 0.000 V          |
| Adjustment Tolerance     | Auto             |
| Adjust volume            |                  |
| Position                 | Isocenter        |
| Orientation              | Transversal      |
| Rotation                 | 0.00 deg         |
| R >> L                   | 350 mm           |
| A >> P                   | 263 mm           |
| F >> H                   | 350 mm           |

## Physio

|                             |             |
|-----------------------------|-------------|
| 1st Signal/Mode             | ECG/Trigger |
| Average cycle               | 340 ± 10 ms |
| Captured cycle              | -not set-   |
| Acquisition window          | 829 ms      |
| Trigger pulse               | 1           |
| Trigger delay               | 340 ms      |
| Segments                    | 78          |
| Phases                      | 1           |
| -----                       |             |
| Tagging                     | None        |
| Dark blood                  | Off         |
| Cine                        | Off         |
| Inline ventricular function | Off         |

## Inline

# SIEMENS MAGNETOM Avanto syngo MR B17

|                      |     |
|----------------------|-----|
| Subtract             | Off |
| Std-Dev-Sag          | Off |
| Std-Dev-Cor          | Off |
| Std-Dev-Tra          | Off |
| Std-Dev-Time         | Off |
| MIP-Sag              | Off |
| MIP-Cor              | Off |
| MIP-Tra              | Off |
| MIP-Time             | Off |
| Save original images | On  |

## Sequence

|                     |            |
|---------------------|------------|
| Introduction        | Off        |
| Dimension           | 2D         |
| Reordering          | Linear     |
| Asymmetric echo     | Allowed    |
| Bandwidth           | 898 Hz/Px  |
| Optimization        | Min. TE TR |
| Echo spacing        | 2.6 ms     |
| Sequence type       | Trufi      |
| -----               |            |
| Define              | Shots      |
| Shots per slice     | 1          |
| Trufi delta freq.   | 0 Hz       |
| RF pulse type       | Fast       |
| Gradient mode       | Fast       |
| Excitation          | Slice-sel. |
| Flip angle mode     | Constant   |
| -----               |            |
| Mode                | MOLLI      |
| Inversions          | 3          |
| Acquisition 1st Inv | 5 HBs      |
| Acquisition 2nd Inv | 1 HBs      |
| Acquisition 3rd Inv | 1 HBs      |
| Acquisition 4th Inv | 0 HBs      |
| Acquisition 5th Inv | 0 HBs      |
| Recovery 1st Inv    | 1 HBs      |
| Recovery 2nd Inv    | 1 HBs      |
| Recovery 3rd Inv    | 0 HBs      |
| Recovery 4th Inv    | 0 HBs      |
| Recovery 5th Inv    | 0 HBs      |
| TI                  | 100.0 ms   |
| TI increment        | 80 ms      |
| MOLLI Trigger delay | 500 ms     |
